# Supplementary material for: Metal-doped mesoporous ZrO2catalyzed chemoselective synthesis of allylic alcohols from Meerwein–Ponndorf–Verley reduction of α,β-unsaturated aldehydes
Source: Royal Society of Chemistry journal article supplement (doi:10.1039/d1nj00936b), 2021-01-01
Supplement: d1nj00936b1.pdf [file d1nj00936b1.pdf]

## Supplementary Information

### Meerwein-Ponndorf-Verley reduction of $\alpha,\beta$ -unsaturated aldehydes over metal-doped mesoporous zirconia catalysts: Correlation of surface properties and performance

Christianah Aarinola Akinnawo, Ndzondelelo Bingwa and Reinout Meijboom

Research Centre for Synthesis and Catalysis, Department of Chemistry, University of Johannesburg,

PO Box 524 Auckland Park, Johannesburg, 2006, South Africa.

E-mail: [rmeijboom@uj.ac.za](mailto:rmeijboom@uj.ac.za)

New Journal of Chemistry

#### 1. Experimental

##### 1.1 Synthesis of mesoporous zirconium oxides

The flow diagram in Scheme S1 was followed for the synthesis of the mesoporous zirconium oxides. For the metal-doped zirconia samples, an appropriate ratio w/w% of the metal precursor is added to the solution containing the zirconium precursor.

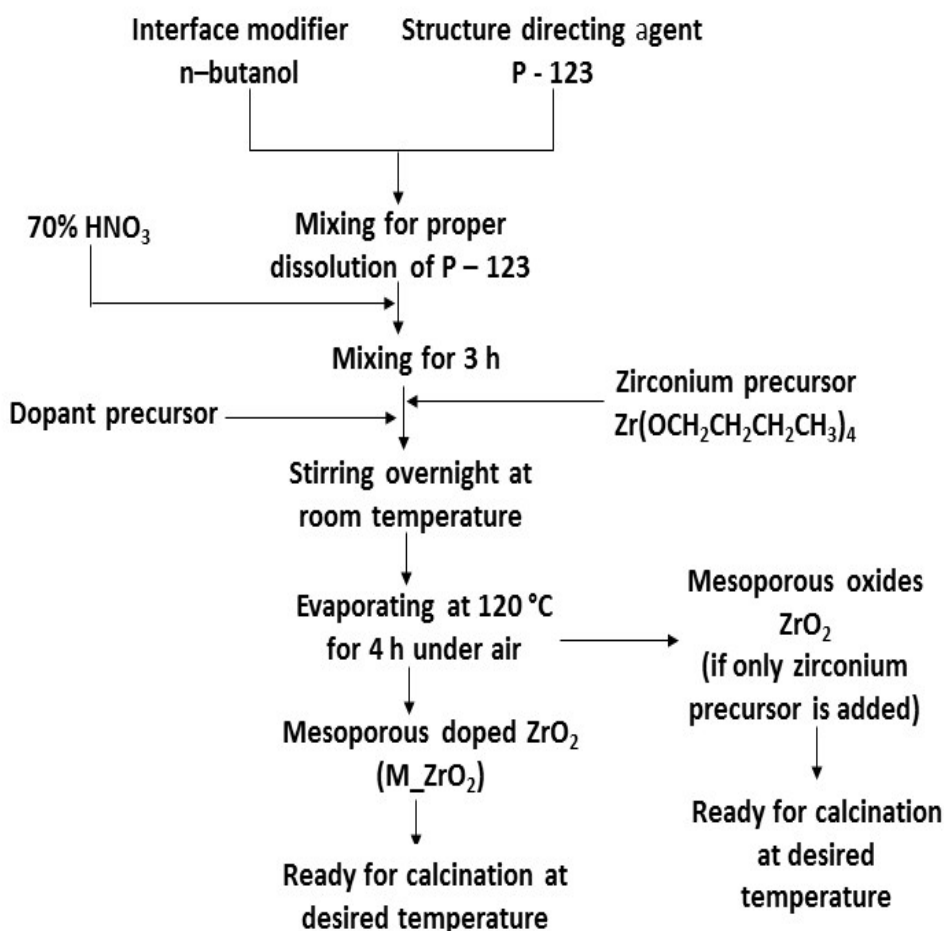

**Scheme S1:** Steps involved in the synthesis of the mesoporous zirconium oxides.

### 1.2 Structural characterization of the mesoporous metal-doped zirconia

Debye-Scherrer equation:

$$\gamma = \frac{k\lambda}{\beta \cos \theta} \quad \text{Equation S1}$$

where  $\gamma$  is the particle size (nm),  $k = 0.89$  (dimensionless shape factor),  $\lambda$  is the X-ray wavelength,  $\beta$  is the line broadening at half the maximum intensity (FWHM) and  $\theta$  is the angle derived from  $2\theta$  values corresponding to maximum intensity peak in the XRD diffractogram.

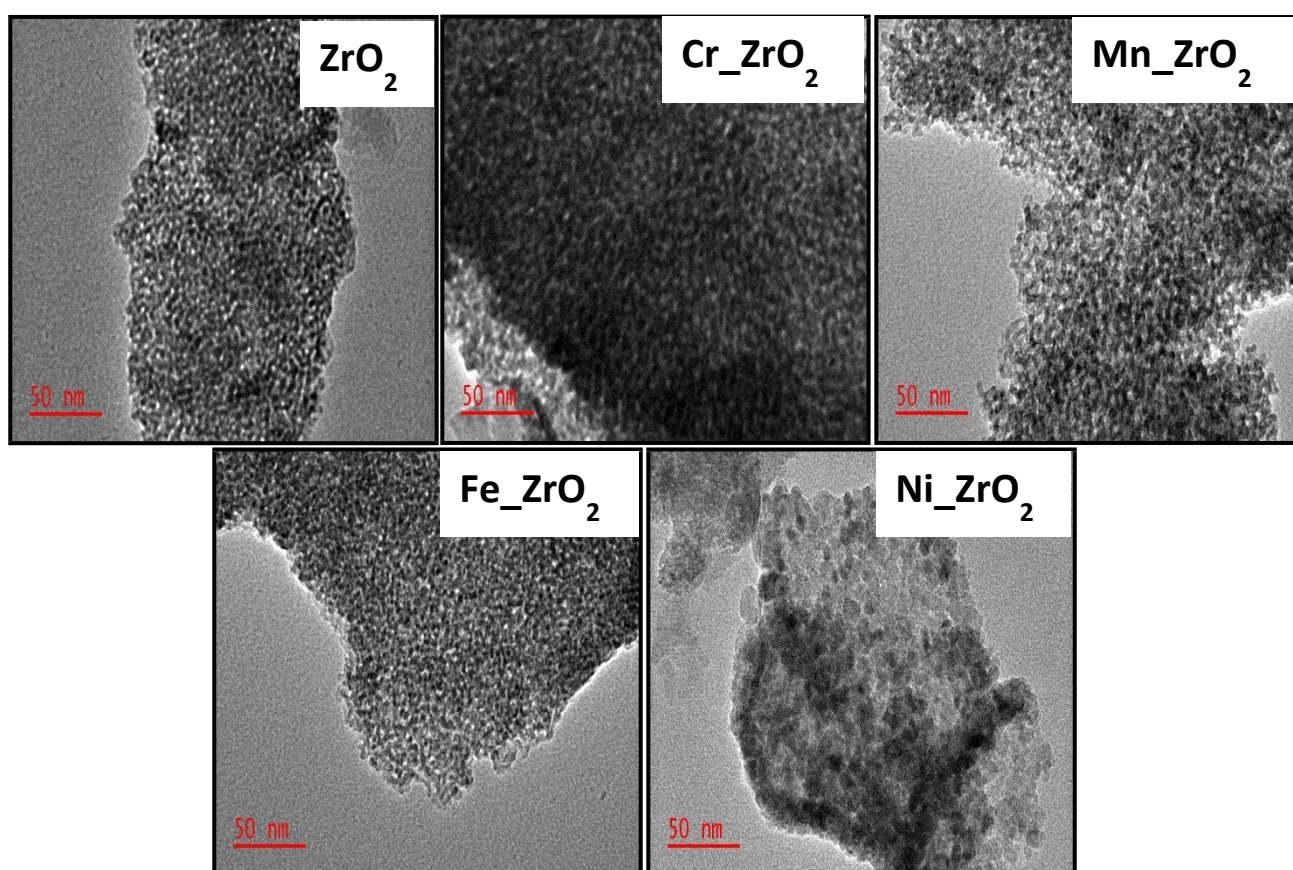

**Fig. S1.** TEM images of the as-synthesized mesoporous catalysts.

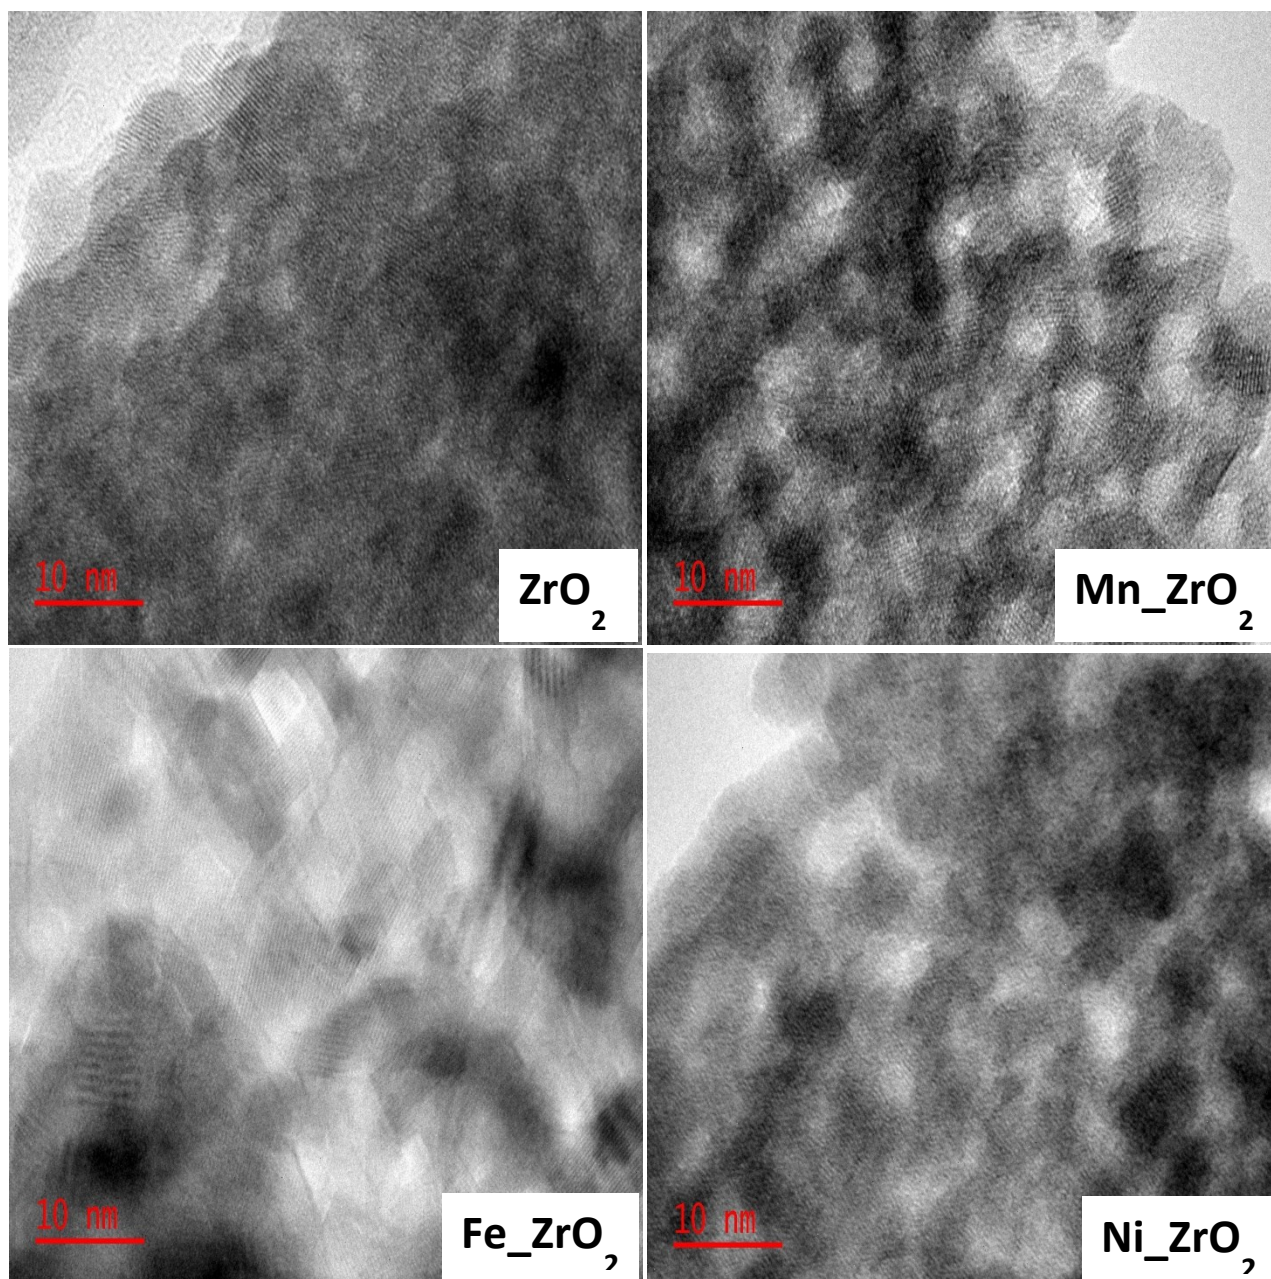

**Fig. S2.** HRTEM images of the as-synthesized mesoporous catalysts

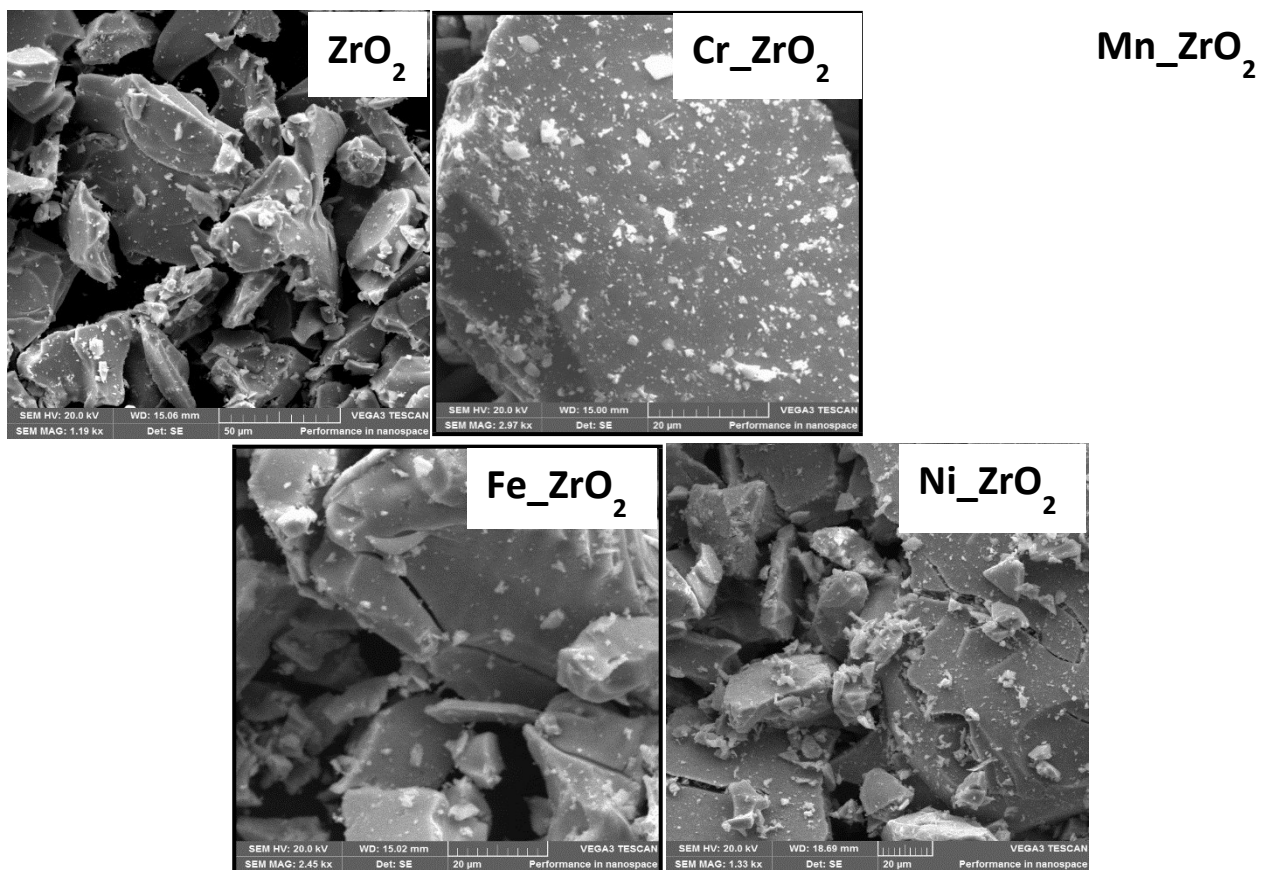

Fig. S3. SEM images of the as-synthesized mesoporous catalysts.

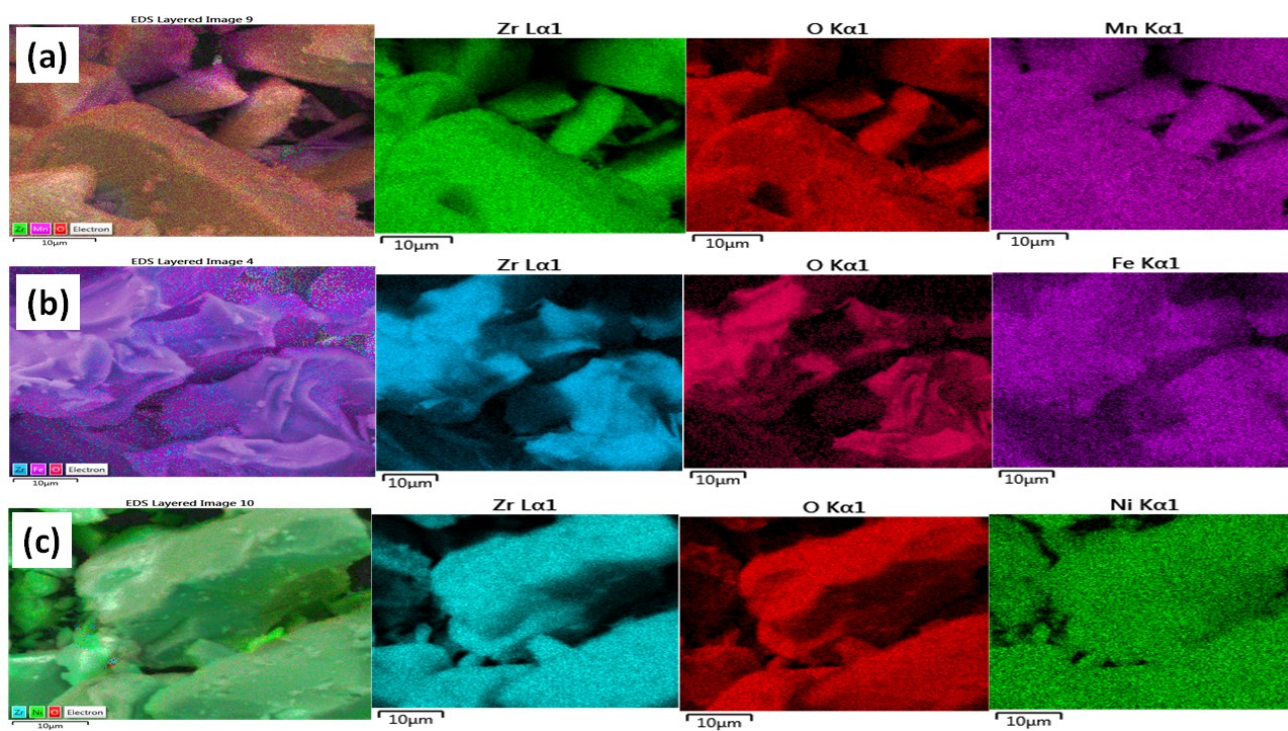

Fig. S4 (a-c) EDX mapping of the mesoporous  $M\_ZrO_2$  catalysts showing the metal distribution.

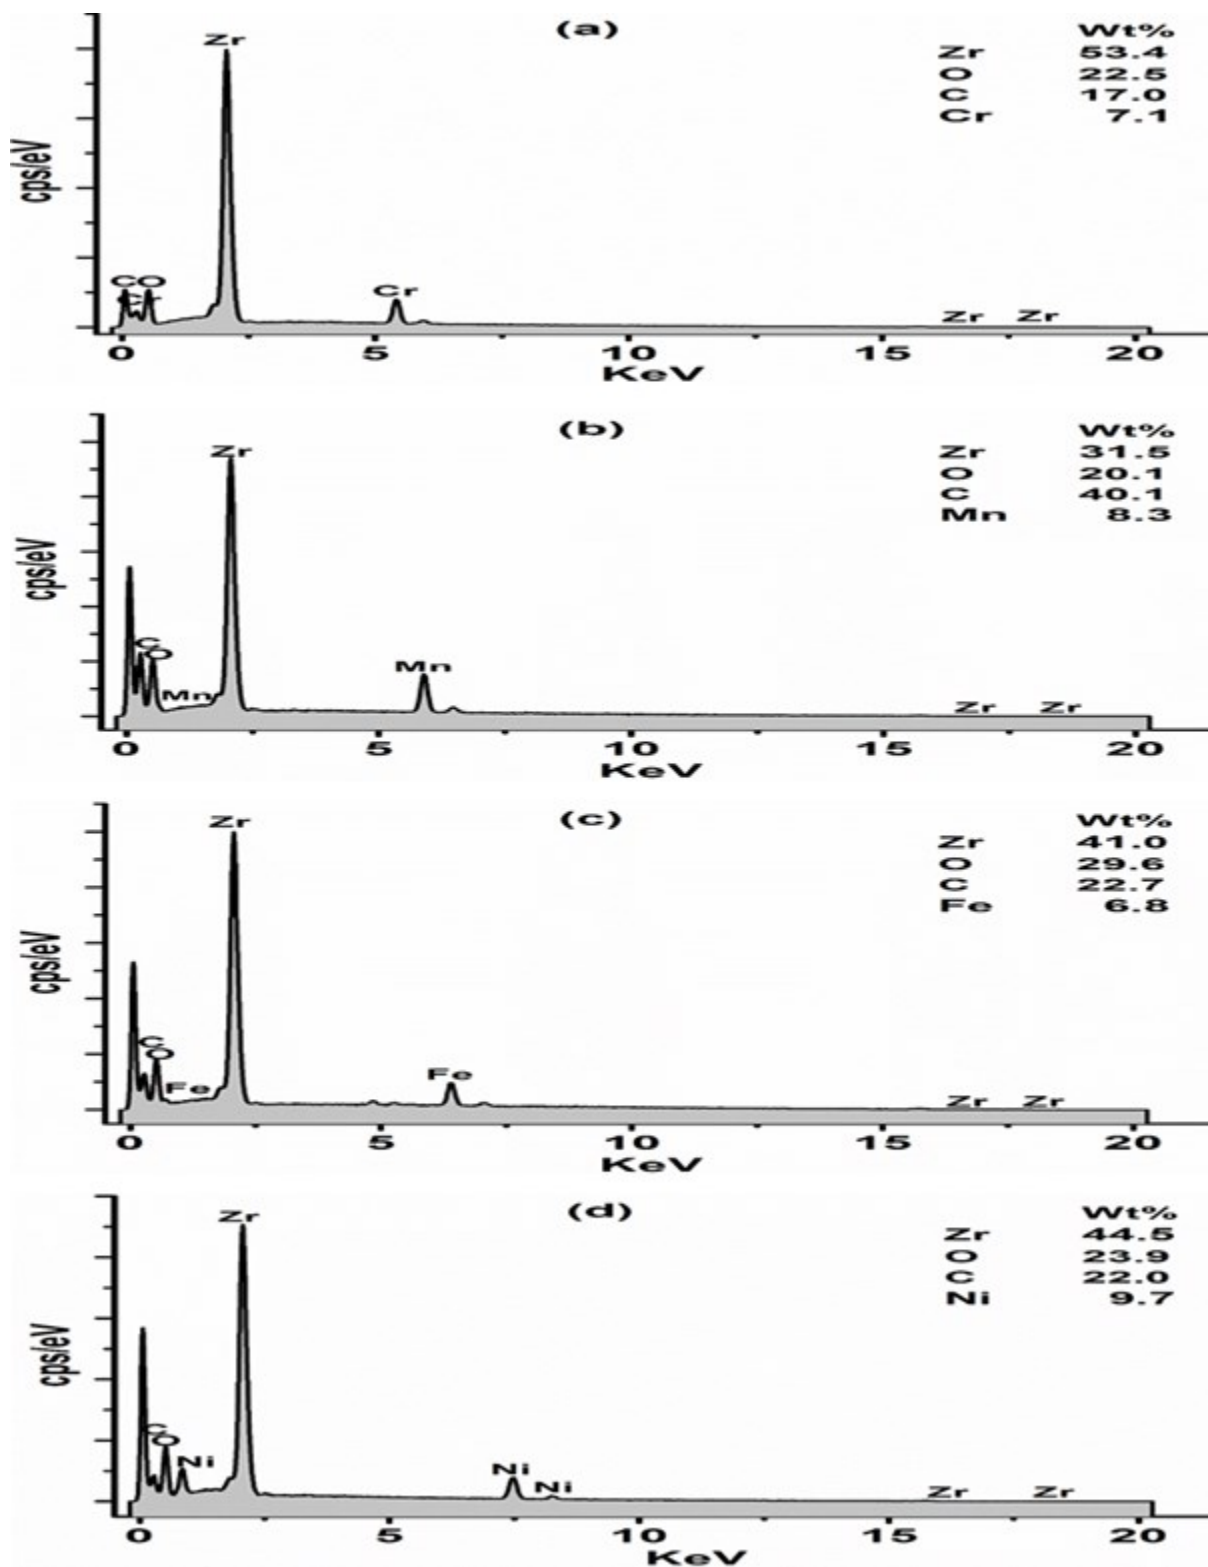

Fig. S5 (a-d) SEM-EDX images of the mesoporous M-ZrO<sub>2</sub> catalysts showing the respective metal content.

### 1.3 Catalytic activity of mesoporous zirconia in MPV reduction of carbonyl compounds

#### 1.3.1 Preliminary tests

Based on the data obtained in Fig. S4, the thermal treatment of 350 °C was chosen as the optimized calcination temperature for the preparation M\_ZrO<sub>2</sub> catalysts. To avoid random selection of an aldehyde for optimizing the reaction conditions, a quick probe of all the pure zirconia prepared with various calcination temperature in the MPV reduction of cinnamaldehyde, citral and benzaldehyde were performed under the starting reaction conditions as reported in the literature<sup>1-3</sup>. As shown in Fig. S4, cinnamaldehyde and citral gave products over all the catalysts variation with the latter having higher conversion while a product was only formed in the conversion of benzaldehyde over ZrO<sub>2</sub> calcined at 350 °C. Hence, citral was the chosen substrate for the model reaction ZrO<sub>2</sub> catalysts.

The basis for the choice of citral is illustrated in Fig. S4. The MPV process variables such as the agitation rate, required catalyst amount, concentration of substrate, reaction temperature and time were studied over pure ZrO<sub>2</sub>. The optimal reaction conditions were adopted in the comparative study of the catalytic activity of the synthesized M\_ZrO<sub>2</sub>. It was observed that the experiment performed without catalyst did not proceed even after 24 h. The reactivity of the reduction process under different reaction conditions was monitored by calculating their observed rate constant  $k_{obs}$  using Kinetic studio version 2.08 software. The  $k_{obs}$  is the slope derivative of the graph  $Y = -A * \exp(-R * X) + C$ . The substrate conversion, product selectivity and normalized activity of the catalysts were also calculated.

$$\text{Conversion (\%)} = \frac{(\text{Substrate}_{in} - \text{Substrate}_{out}) \times 100}{\text{Substrate}_{in}} \quad \text{Equation S2}$$

$$\text{Selectivity (\%)} = \frac{\text{Product}_a}{\text{Product}_a + \text{Product}_b} \times 100 \quad \text{Equation S3}$$

$$\text{Activity}_{\text{normalized}} = \frac{\text{mol converted (mmol)}}{\text{BET}_{SA} (\text{m}^2 \text{g}^{-1}) \text{ or catalyst amount (g)}} \quad \text{Equation S4}$$

$$\text{Mol converted (mmol)} = \frac{\text{Conversion (\%)} \times \text{Substrate}_{in}}{100} \quad \text{Equation S5}$$

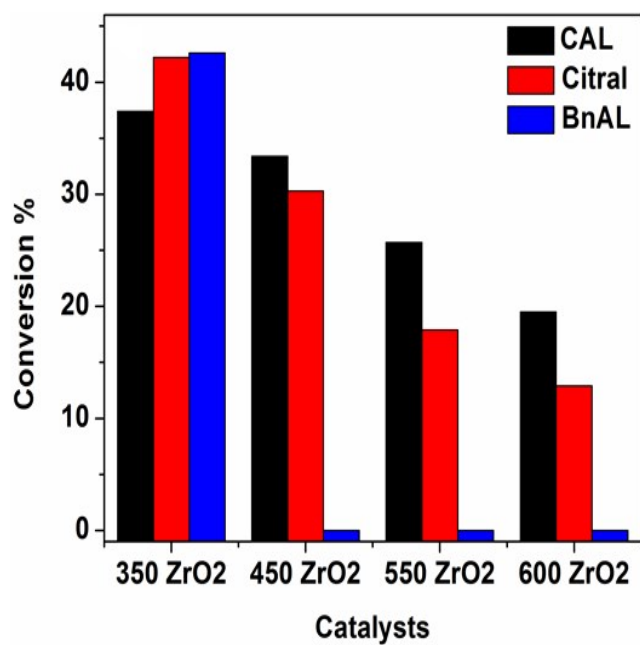

**Fig. S6.** Indicating the preliminary probe of the catalysts as well as substrates (CAL = cinnamaldehyde, BnAl = benzaldehyde).

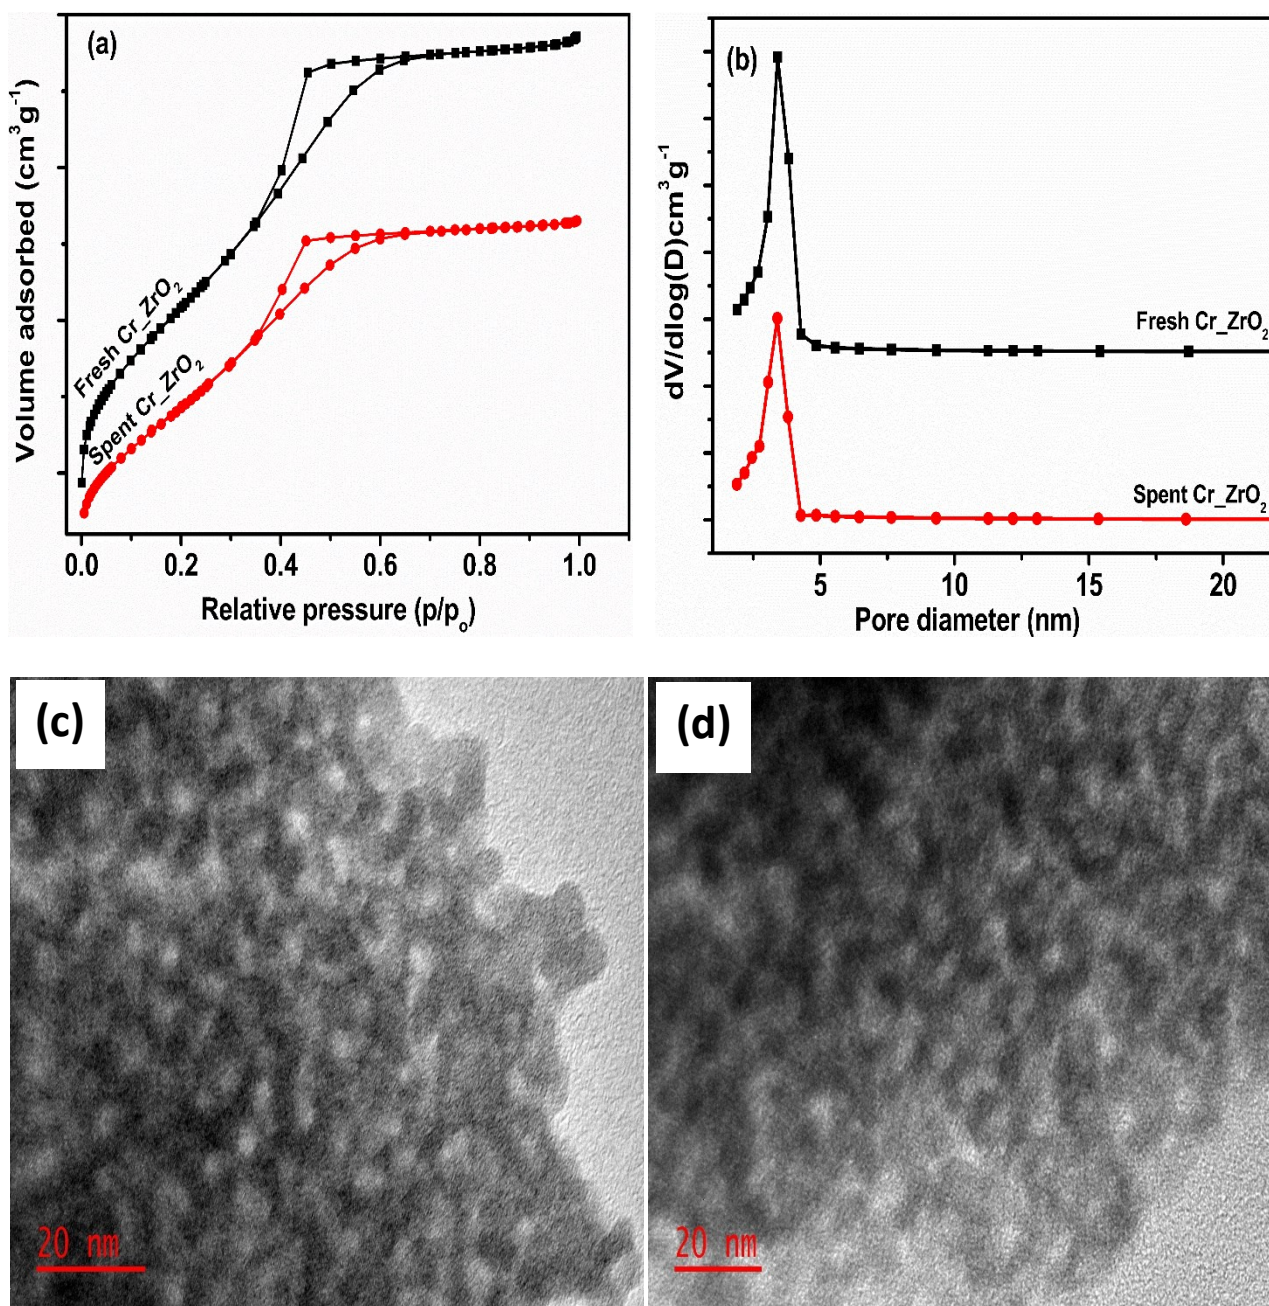

**Figure S7.** N<sub>2</sub> adsorption-desorption isotherms (a), pore size distribution (b); TEM images of fresh (c) and spent (d) of Cr<sub>2</sub>ZrO<sub>2</sub> catalysts.

### 1.3.2 GC details for both FID and MS except otherwise stated

Column: Restek RTX-5; length 30.0 m, inner diameter 0.25 mm ID, film thickness 0.25 μm

Injector temperature: 200 °C

Column oven temperature program

| Rate | Temperature (°C) | Hold time (min) |
|------|------------------|-----------------|
|------|------------------|-----------------|



---

|   |       |       |      |
|---|-------|-------|------|
| 0 | 0     | 40.0  | 2.00 |
| 1 | 20.00 | 280.0 | 5.00 |
| 2 | 0.00  | 0.0   | 0.00 |

---

Total program time: 19 min

Carrier gas: nitrogen, 25.0 ml/min

Flow control mode: linear velocity

Injection mode: split

Split ratio: 20:1

Purge flow: 3.0 ml/min

FID temperature: 350 °C

MS ion source temperature: 200 °C

MS interface temperature: 250 °C.

---

1.3.4 GC chromatograms of reactivity of Cr<sub>2</sub>ZrO<sub>2</sub> in the MPV reduction of citral under optimum reaction conditions

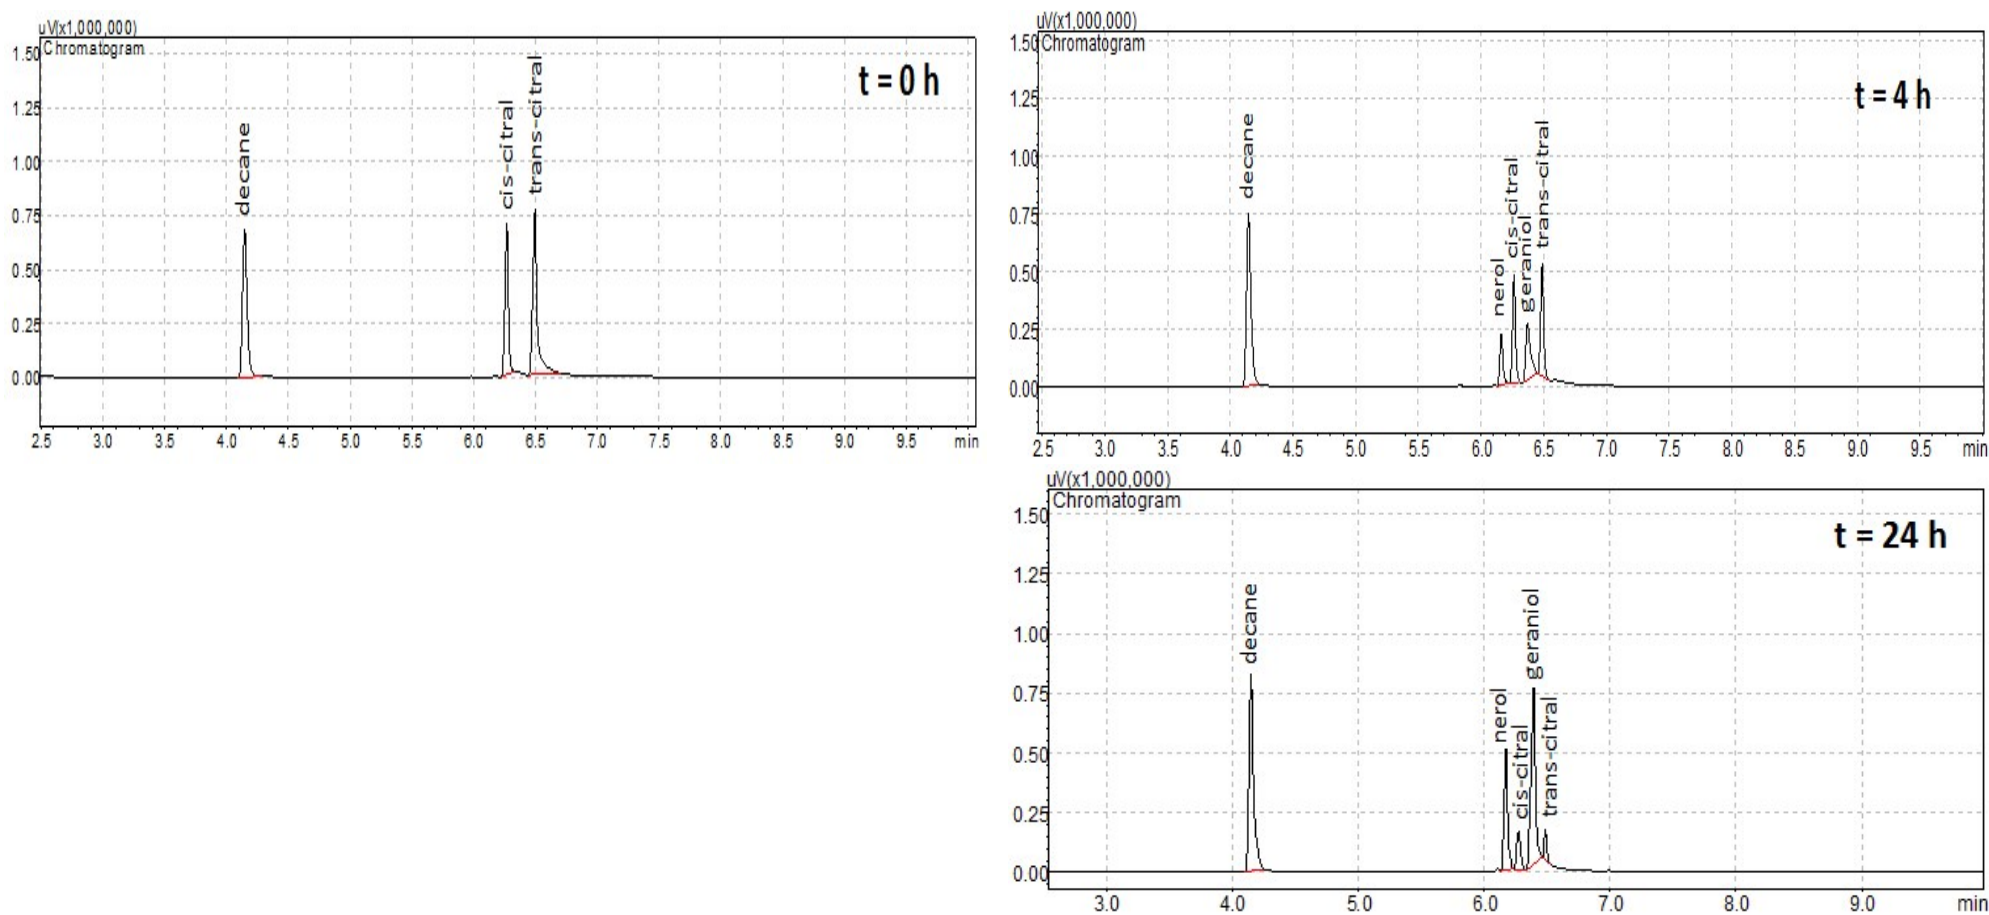

Fig. S8. GC-FID chromatogram under optimum reaction conditions at t = 0, 4, 8 and 24 h. The conversion of citral increased with reaction time.

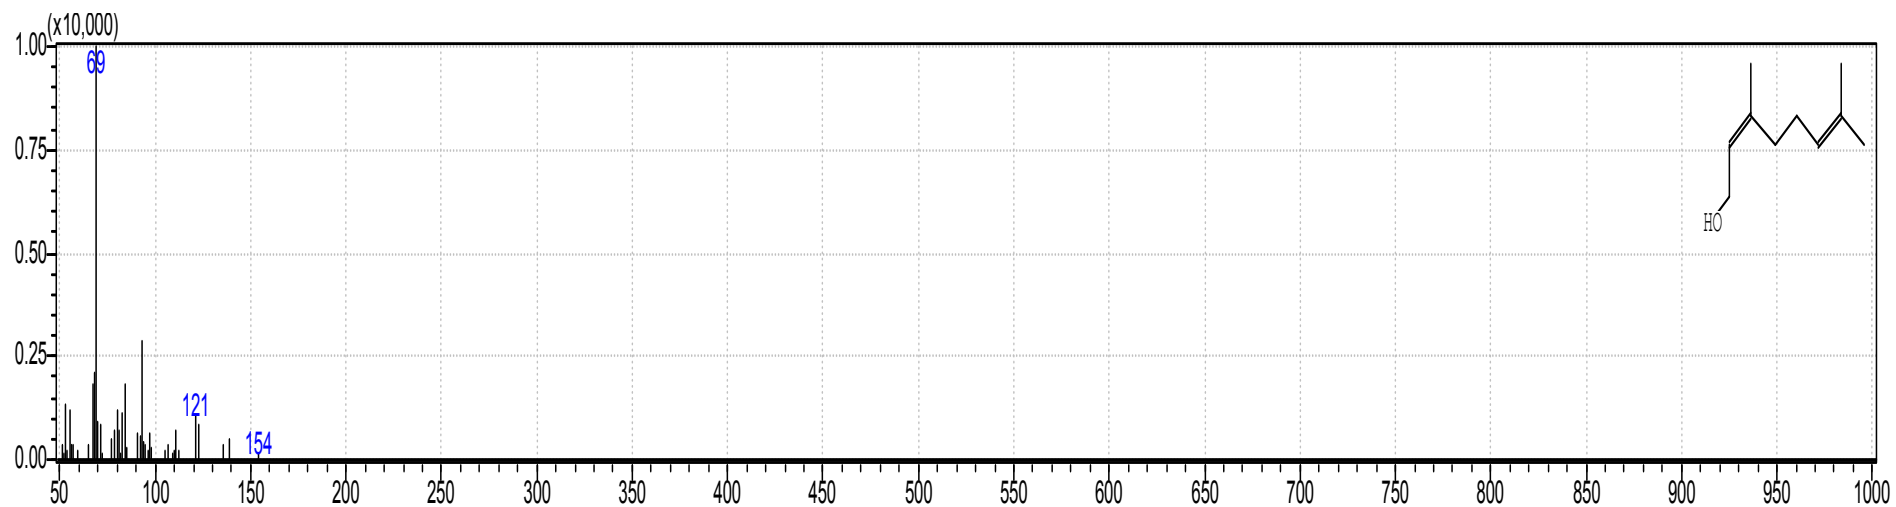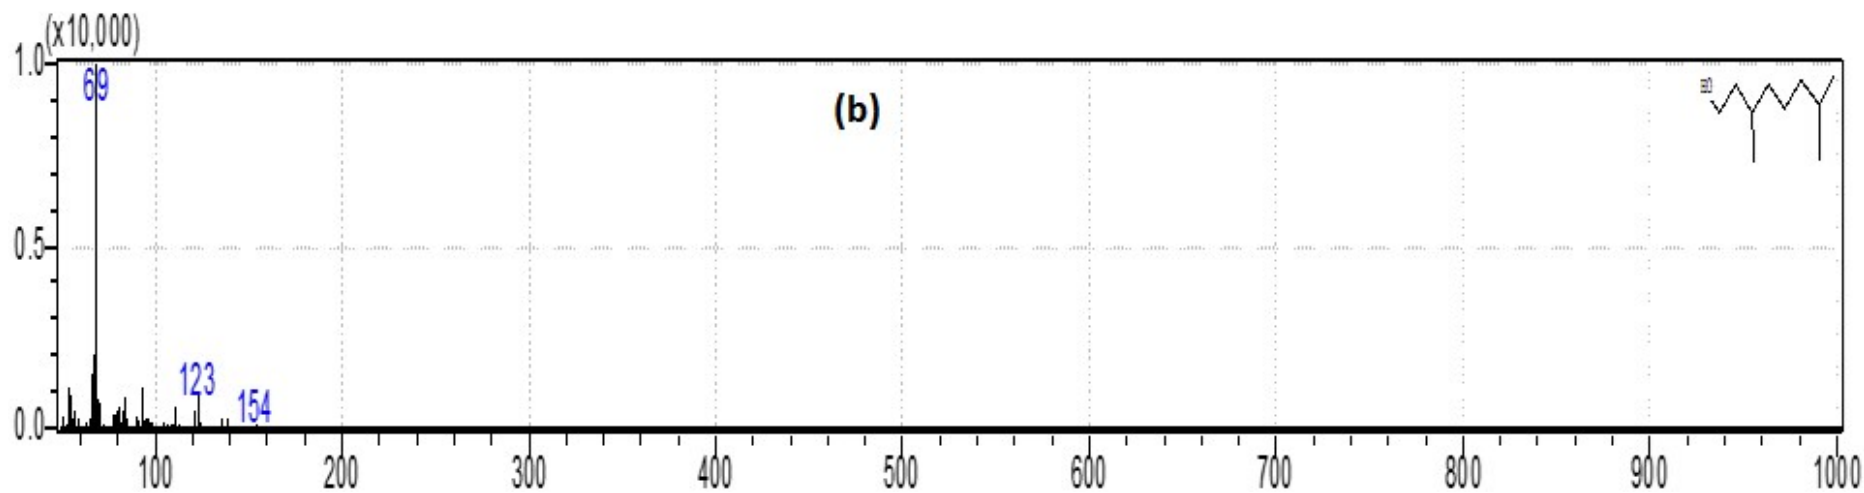

Fig. S9. GC-MS chromatogram confirming the products (a) nerol and (b) geraniol.

## References

- (1) Urbano, F. J.; Aramendía, M. A.; Marinas, A.; Marinas, J. M. An Insight into the Meerwein–Ponndorf–Verley Reduction of  $\alpha$ ,  $\beta$ -Unsaturated Carbonyl Compounds: Tuning the Acid–Base Properties of Modified Zirconia Catalysts. *J. Catal.* **2009**, *268* (1), 79–88.
- (2) Zhang, B.; Minhui, T.; Jian, Y.; Lei, W. U. Support Effect in Meerwein-Ponndorf-Verley Reduction of Benzaldehyde over Supported Zirconia Catalysts. *Chinese J. Catal.* **2012**, *33* (4–6), 914–922.
- (3) Wang, F.; Ta, N.; Shen, W. MgO Nanosheets, Nanodisks, and Nanofibers for the Meerwein–Ponndorf–Verley Reaction. *Appl. Catal. A Gen.* **2014**, *475*, 76–81.
